# Supplementary material for: Core–shell magnetic zinc-based molecularly imprinted polymer: a robust heterogeneous catalytic nanoreactor toward the CO2 fixation reaction
Source: Royal Society of Chemistry journal article supplement (doi:10.1039/d3en00554b), 2024-01-01
Supplement: d3en00554b1.pdf [file d3en00554b1.pdf]

# Core-shell magnetic zinc-based molecularly imprinted polymer: a robust heterogeneous catalytic nanoreactor toward CO<sub>2</sub> fixation reaction

Tahereh Nasiriani,<sup>a</sup> Neda Adabi,<sup>a</sup> Ahmad Shaabani,<sup>a,b\*</sup>

<sup>a</sup>Department of Organic Chemistry, Shahid Beheshti University, Daneshjou Boulevard, Tehran, 1983969411, Iran

<sup>b</sup>Peoples' Friendship University of Russia (RUDN University), 6, Miklukho-Maklaya Street, Moscow, 117198, Russian Federation

## Contents

|                                                            |   |
|------------------------------------------------------------|---|
| 1. <sup>1</sup> H NMR data of isolated pure products ..... | 1 |
| 2. <sup>1</sup> H NMR spectrum of products 6a-f .....      | 3 |

## 1. <sup>1</sup>H NMR data of isolated pure products

### 4-(Phenoxymethyl)-1,3-dioxolan-2-one (6a).

White solid: <sup>1</sup>H NMR (300 MHz, CDCl<sub>3</sub>) δ: 4.13-4.28 (m, 2H), 4.52-4.66 (m, 2H), 5.03-5.09 (m, 1H), 6.91 (2H<sub>Ar</sub>), 7.03 (1H<sub>Ar</sub>), 7.28-7.35 (m, 2H<sub>Ar</sub>).

### 4-Phenyl-1,3-dioxolan-2-one (6b).

White solid: <sup>1</sup>H NMR (300 MHz, CDCl<sub>3</sub>) δ: 4.27-4.32 (m, 1H), 4.76-4.82 (m, 1H), 5.64-5.70 (m, 1H), 7.14-7.42 (m, 5H<sub>Ar</sub>).

### 4-(Chloromethyl)-1,3-dioxolan-2-one (6c).

White solid: <sup>1</sup>H NMR (300 MHz, CDCl<sub>3</sub>) δ: 3.71-3.85 (2 H, CH<sub>2</sub>Cl), 4.39-4.44 (m, 1 H, OCH<sub>2</sub>), 4.57-4.63 (m, 1 H, OCH<sub>2</sub>), 4.97-5.04 (m, 1 H, OCH<sub>2</sub>).

### 4-(1-Propenyloxymethyl)-1,3-dioxolan-2-one (6d).

White solid: <sup>1</sup>H NMR (300 MHz, CDCl<sub>3</sub>) δ: 5.98 (s, 1H, =CH), 5.51 (s, 1H, =CH), 4.97 (1H, OCH), 4.53 (1H, OCH<sub>2</sub>), 4.38 (3H, OCH<sub>2</sub>, OCH), 1.93 (s, 3H, CH<sub>3</sub>).

### 4-Butyl-1,3-dioxolan-2-one (6e).

---

\*Corresponding author. Tel.: +982129902800; e-mail: [a-shaabani@sbu.ac.ir](mailto:a-shaabani@sbu.ac.ir)

Orange oil:  $^1\text{H}$  NMR (300 MHz,  $\text{CDCl}_3$ )  $\delta$ : 0.59-0.80 (m, 3H), 1.17-1.24 (m, 4H), 1.51-1.63 (m, 2H), 3.88-3.95 (m, 1H), 4.37-4.44 (m, 1H), 4.53-4.63 (m, 1H).

**Octahydrocycloocta[*d*][1,3]dioxol-2-one (6f).**

Colorless oil:  $^1\text{H}$  NMR (300 MHz,  $\text{CDCl}_3$ )  $\delta$ : 0.98-1.03 (m, 4H), 1.44-1.47 (m, 4H), 1.89-2.02 (m, 4H), 3.37-3.39 (m, 2H).

**2.  $^1\text{H}$  NMR spectrum of products 6a-f**

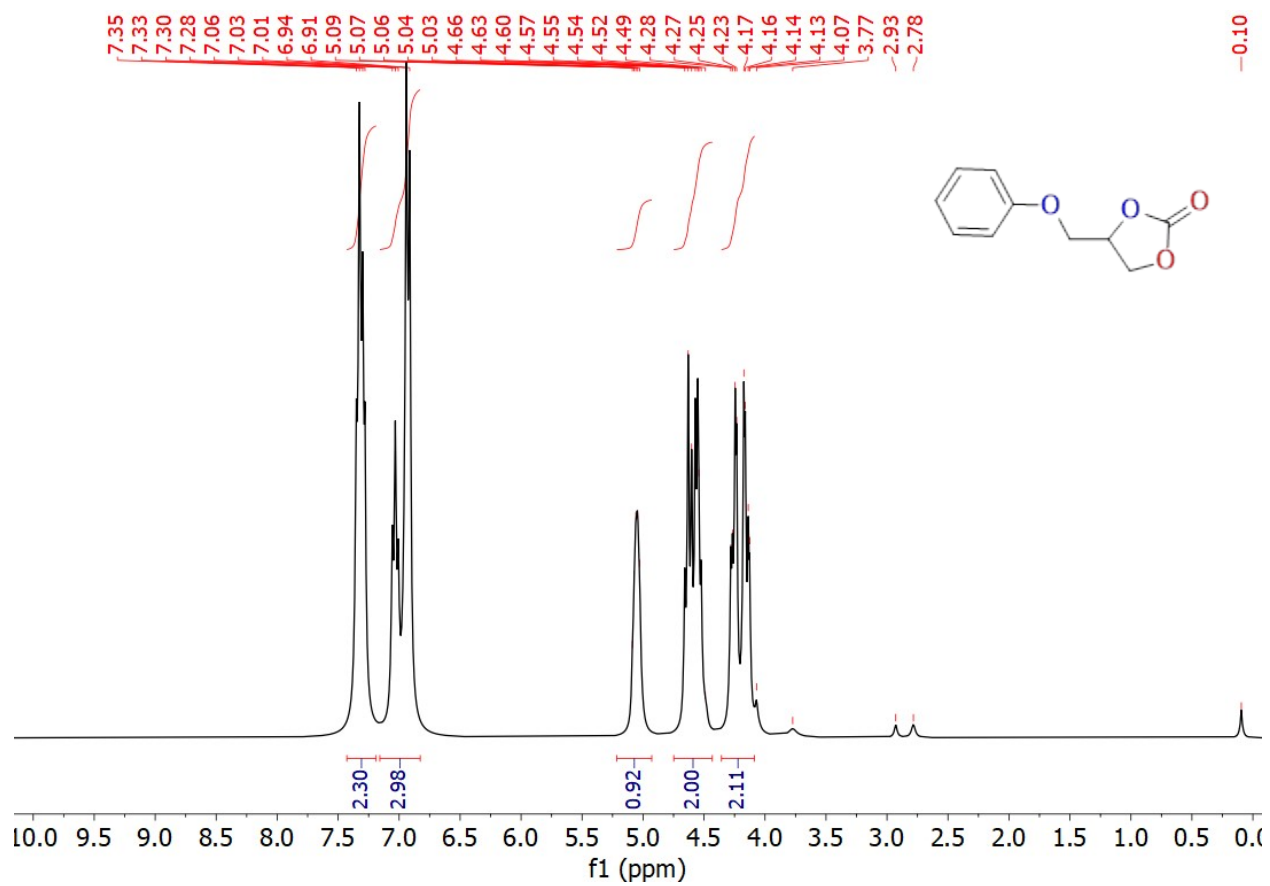

**Figure S1.** <sup>1</sup>H NMR spectrum of 4-(phenoxymethyl)-1,3-dioxolan-2-one (**6a**).

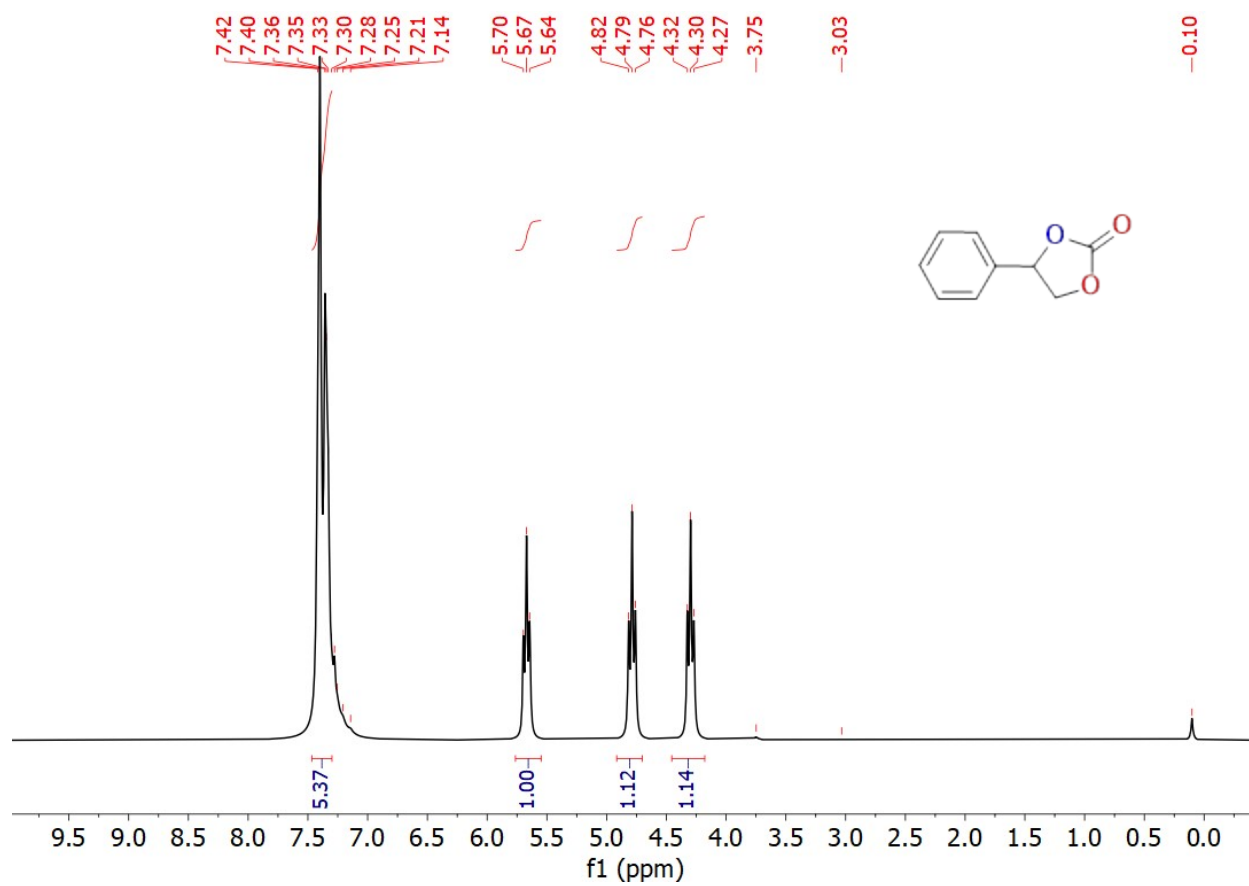

**Figure S2.** <sup>1</sup>H NMR spectrum of 4-phenyl-1,3-dioxolan-2-one (**6b**).

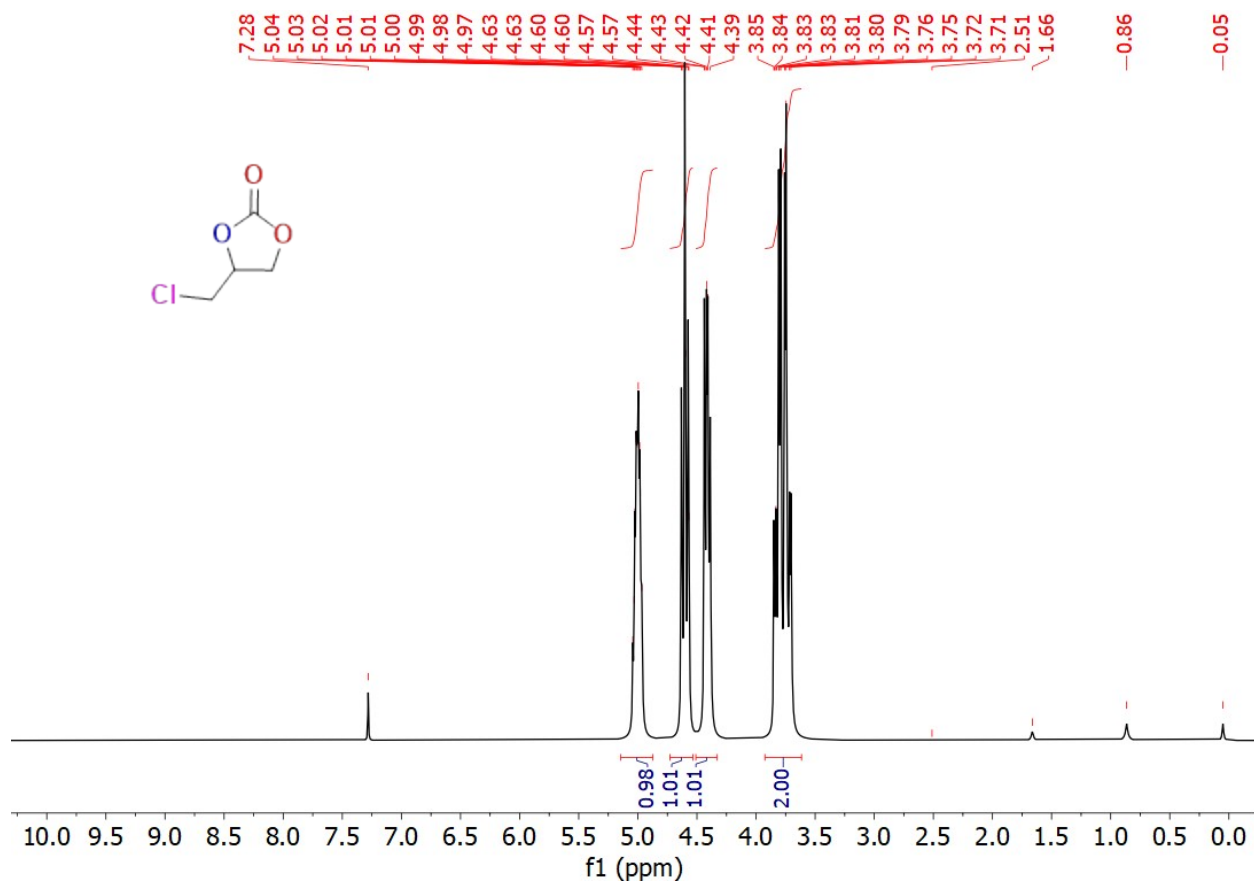

**Figure S3.** <sup>1</sup>H NMR spectrum of 4-(chloromethyl)-1,3-dioxolan-2-one (**6c**).

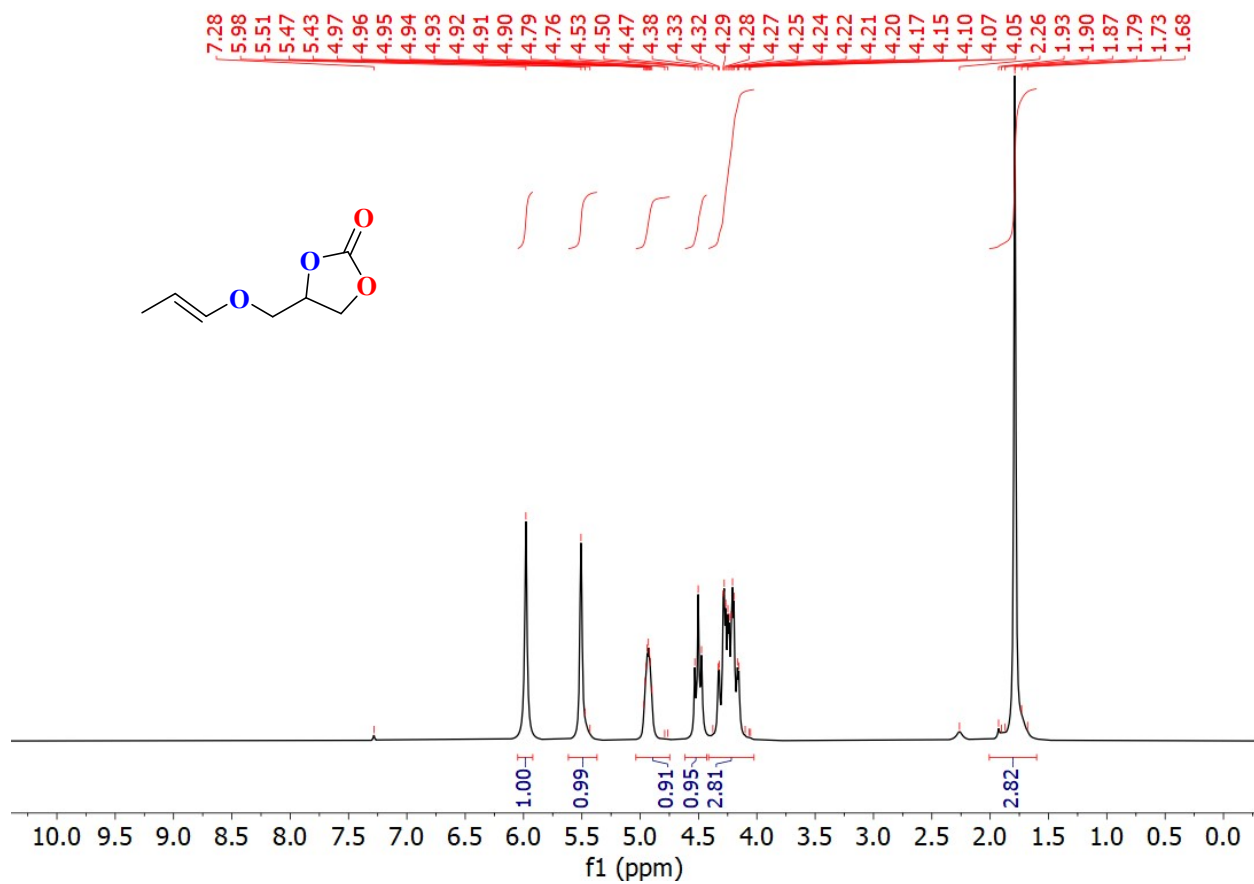

**Figure S4.** <sup>1</sup>H NMR spectrum of 4-(1-Propenyloxymethyl)-1,3-dioxolan-2-one (**6d**).

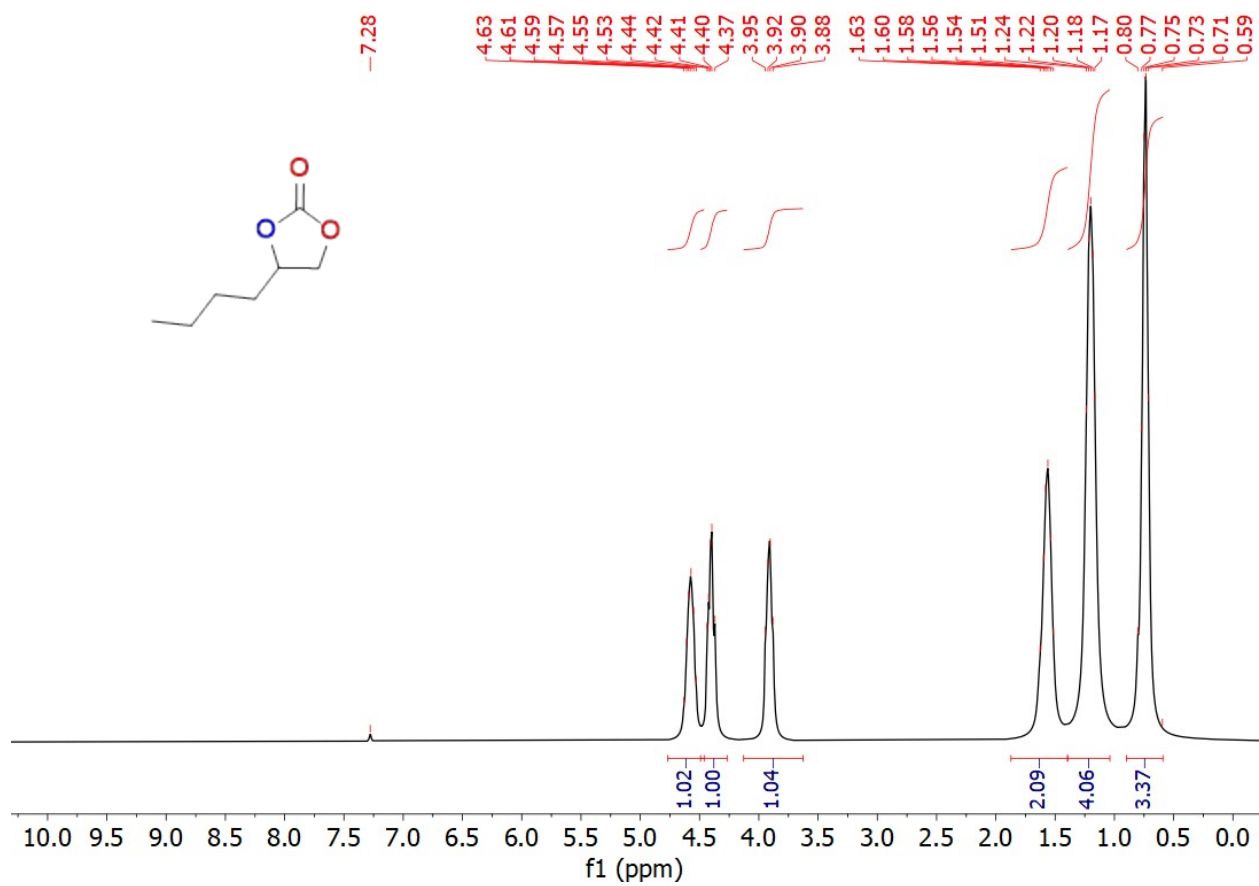

**Figure S5.** <sup>1</sup>H NMR spectrum of 4-butyl-1,3-dioxolan-2-one (**6e**).

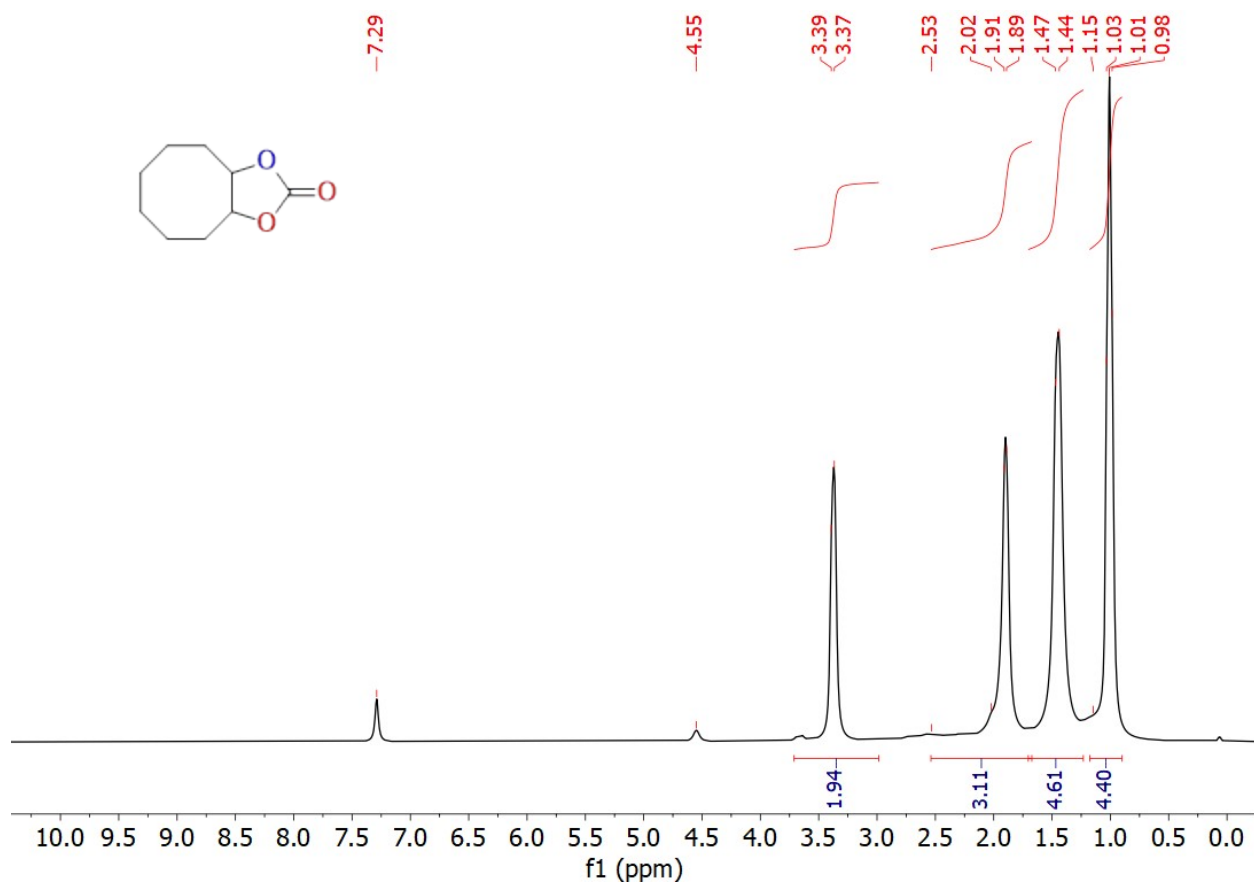

**Figure S6.** <sup>1</sup>H NMR spectrum of octahydrocycloocta[*d*][1,3]dioxol-2-one (6f).
